# Supplementary material for: Vapour phase dehydration of glycerol over VPO catalyst supported on zirconium phosphate
Source: Royal Society of Chemistry journal article supplement (doi:10.1039/c3cy00430a), 2013-10-09
Supplement: c3cy00430a.pdf [file c3cy00430a.pdf]

Figure S-1 N<sub>2</sub> adsorption-desorption isotherm of pure ZrP and different wt% loadings of VPO

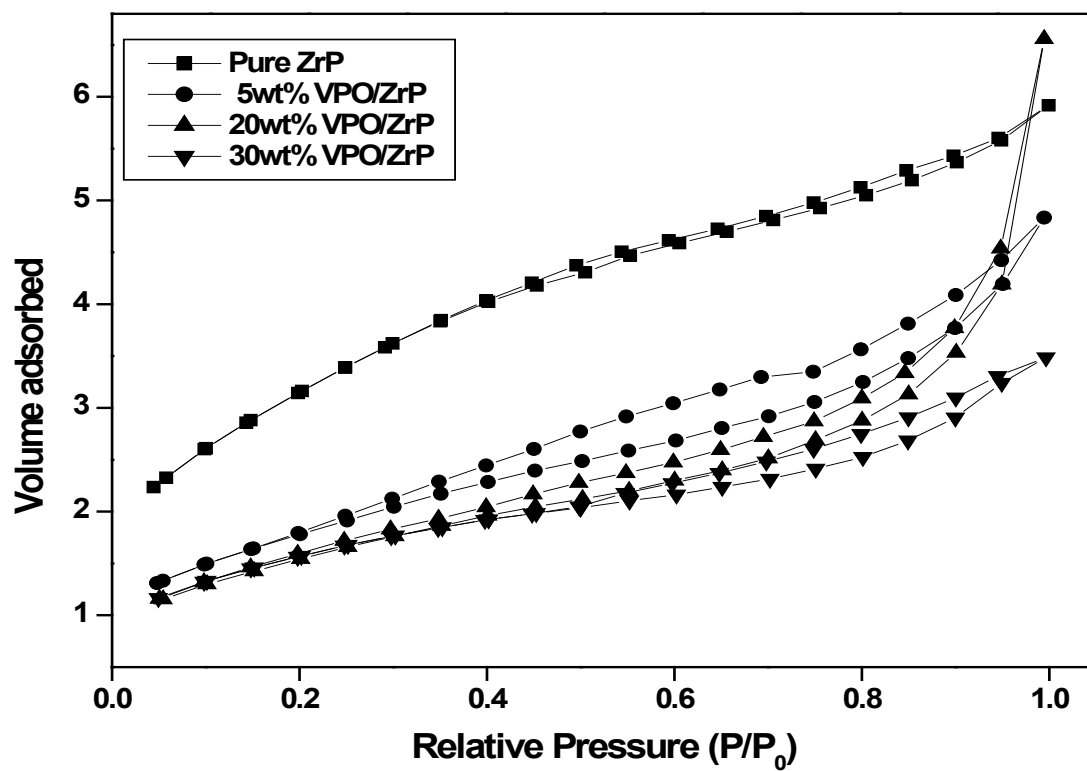

**Figure S-2 TGA analysis of calcined and uncalcined VPO catalyst**

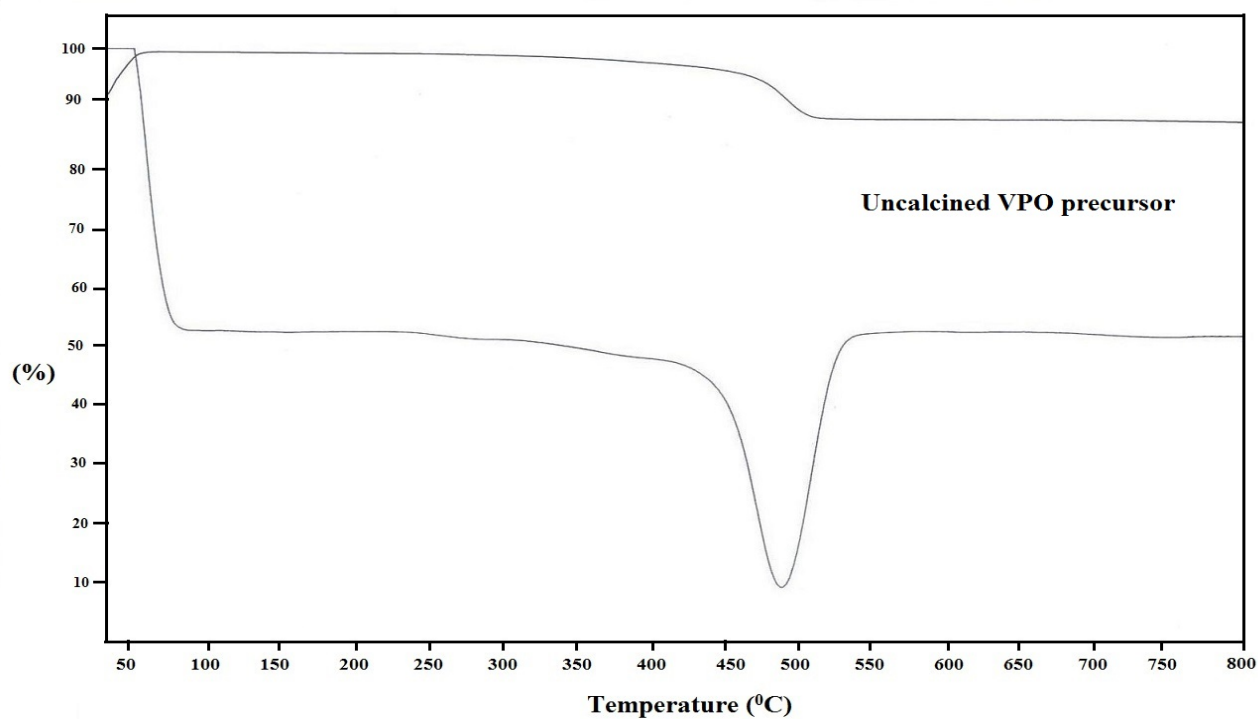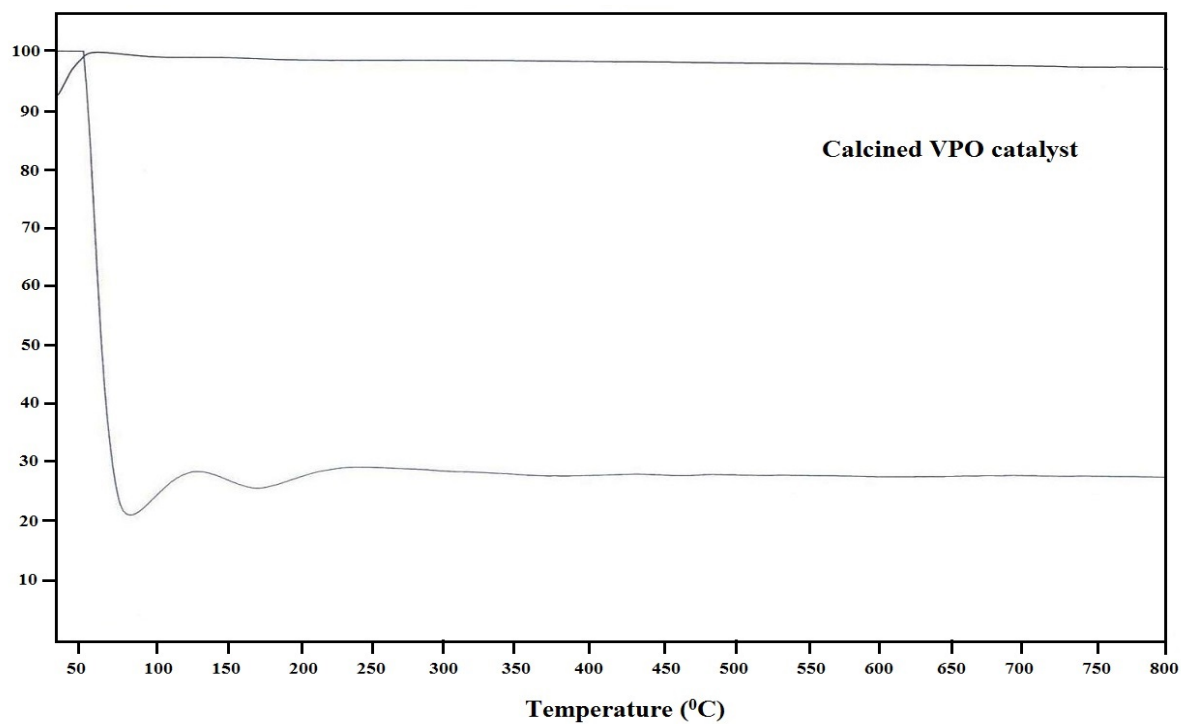

Figure S-3 Pore size analysis:

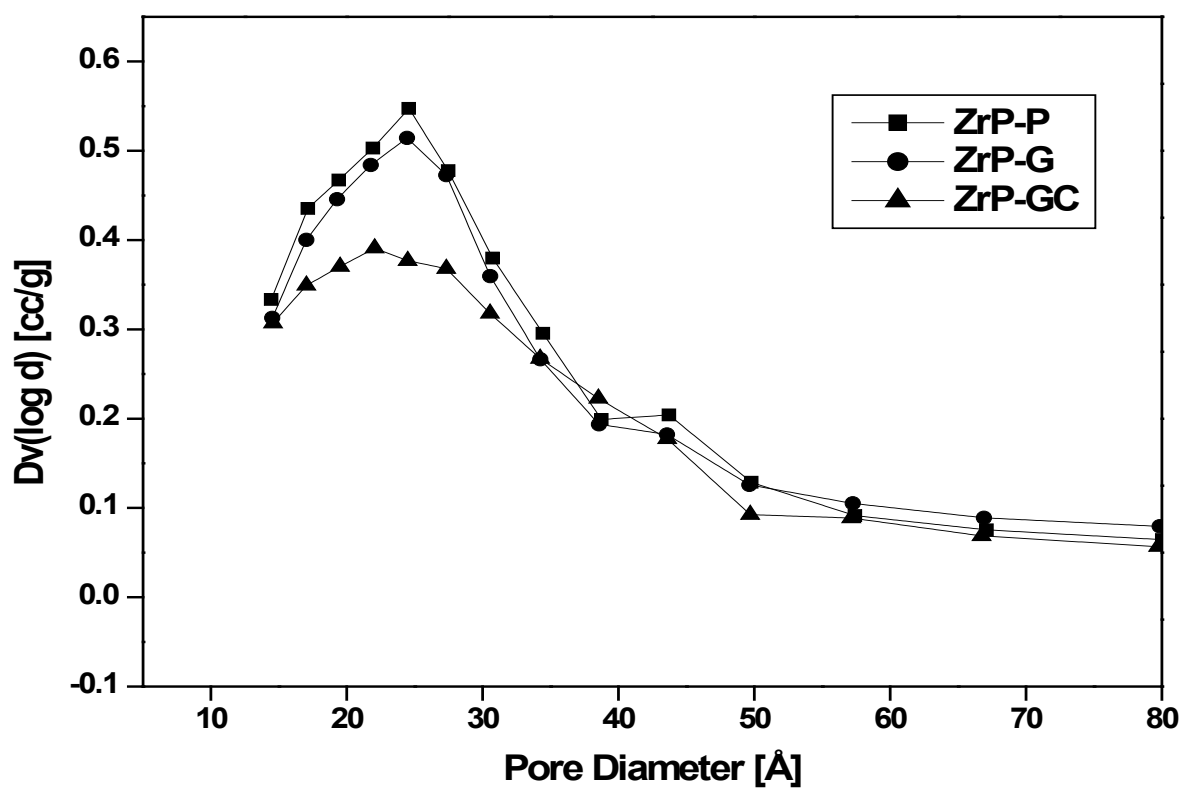

Figure S-3 Pore size analysis of pure zirconium phosphate (ZrP-P), ZrP after grinding for 15 min (ZrP-G), ZrP after grinding for 15 min and calcined at 550 °C (ZrP-GC)

| S.No | Catalyst    | Surface area<br>(m <sup>2</sup> /g) | Pore volume | Pore diameter<br>(Å) |
|------|-------------|-------------------------------------|-------------|----------------------|
| 1.   | Pure ZrP    | 334                                 | 0.36        | 32                   |
| 2.   | Pure ZrP-G  | 336                                 | 0.36        | 32                   |
| 3.   | Pure ZrP-CG | 271                                 | 0.32        | 32                   |
